# Supplementary material for: Studies of CO2 hydrogenation over cobalt/ceria catalysts with in situ characterization: the effect of cobalt loading and metal–support interactions on the catalytic activity
Source: Royal Society of Chemistry journal article supplement (doi:10.1039/d0cy00962h), 2020-01-01
Supplement: d0cy00962h1.pdf [file d0cy00962h1.pdf]

## Supporting information

### Studies of CO<sub>2</sub> Hydrogenation over Cobalt/Ceria Catalysts with *in situ* Characterization: The Effect of Cobalt Loading and Metal-Support Interactions on the Catalytic Activity

Kaixi Deng<sup>1</sup>, Lili Lin<sup>2</sup>, Ning Rui<sup>2</sup>, Dimitriy Vovchok<sup>2</sup>, Feng Zhang<sup>3</sup>, Shuhao Zhang<sup>3</sup>, Sanjaya Senanayake<sup>2</sup>, Taejin Kim<sup>3</sup>, Jose A. Rodriguez<sup>1,2</sup>

1. Department of Chemistry, Stony Brook University, Stony Brook, NY 11794, USA
2. Chemistry Division, Brookhaven National Laboratory, Upton, NY 11973, USA
3. Materials Science and Chemical Engineering Department, Stony Brook University, Stony Brook, NY 11794, USA

## Table of Contents

|                                                            |       |
|------------------------------------------------------------|-------|
| XRD section.....                                           | 2-6   |
| NAP-XPS Section.....                                       | 7     |
| XANES section.....                                         | 8-10  |
| EXAFS section .....                                        | 11-12 |
| The analysis on the Co-O bond length using EXAFS data..... | 13-15 |
| <i>In situ</i> DRIFTS for flow system.....                 | 16    |
| <i>In situ</i> DRIFTS for closed system .....              | 21    |
| Summary of relevant peak assignments in literature .....   | 26    |
| References .....                                           | 27    |

## XRD section

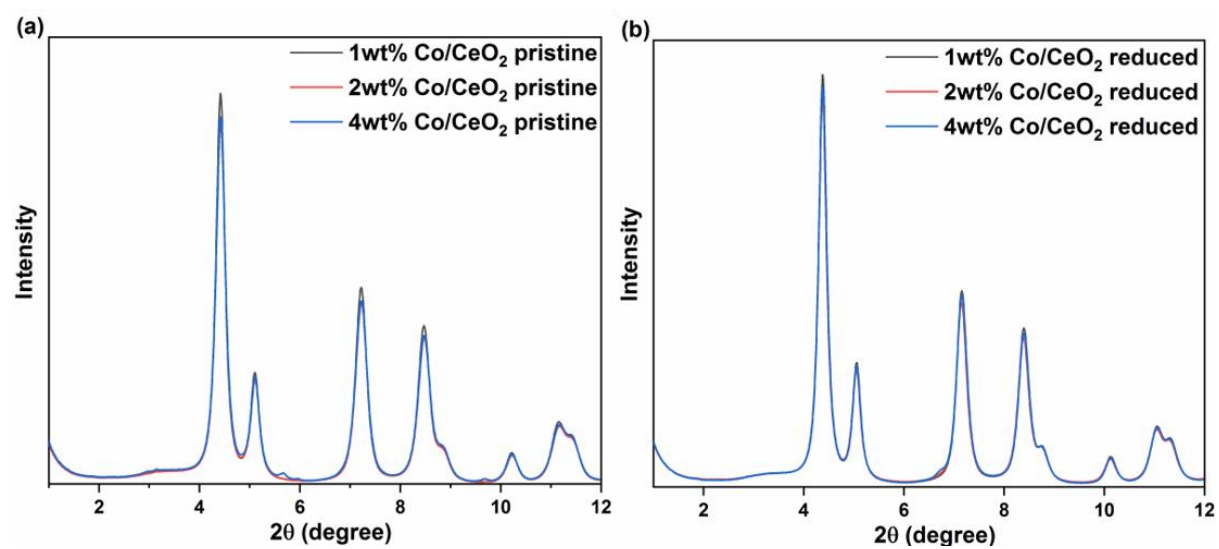

**Figure S1.A.** Full XRD patterns for (a) pristine and (b) reduced Co/CeO<sub>2</sub> samples

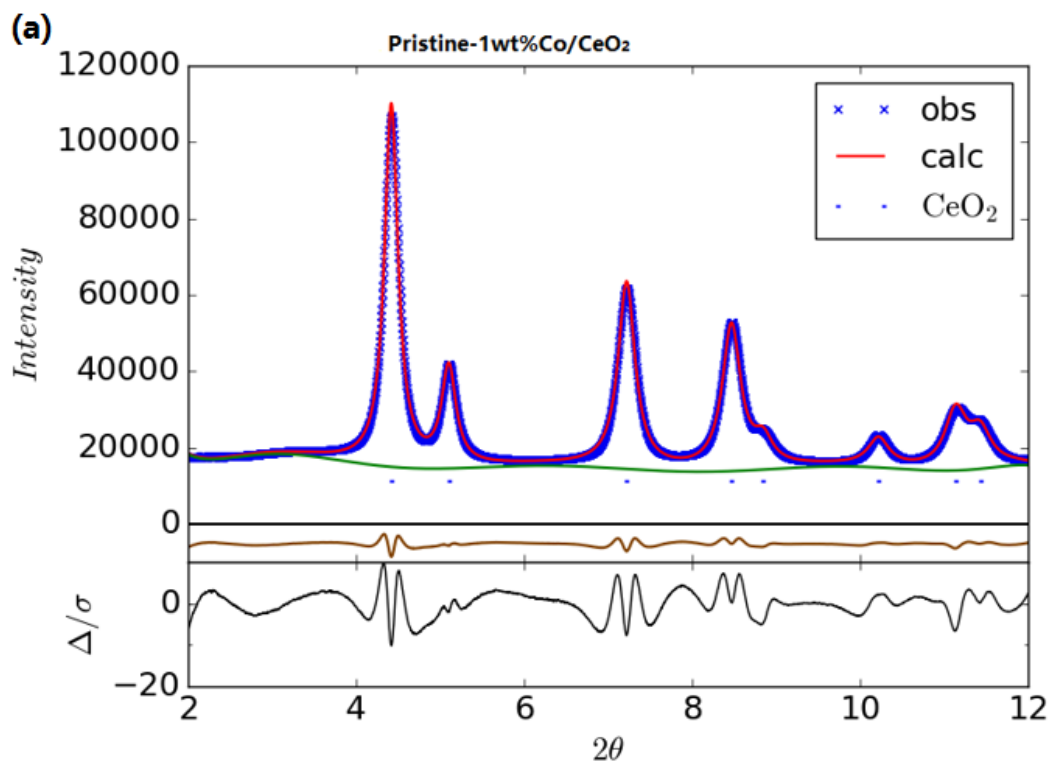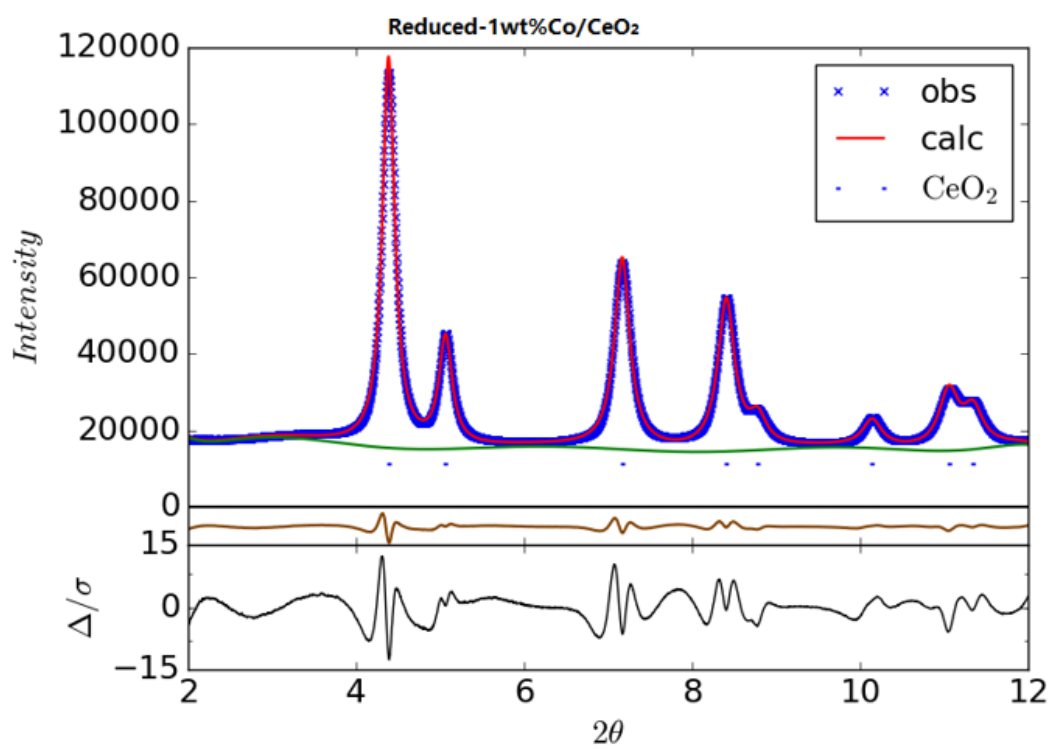

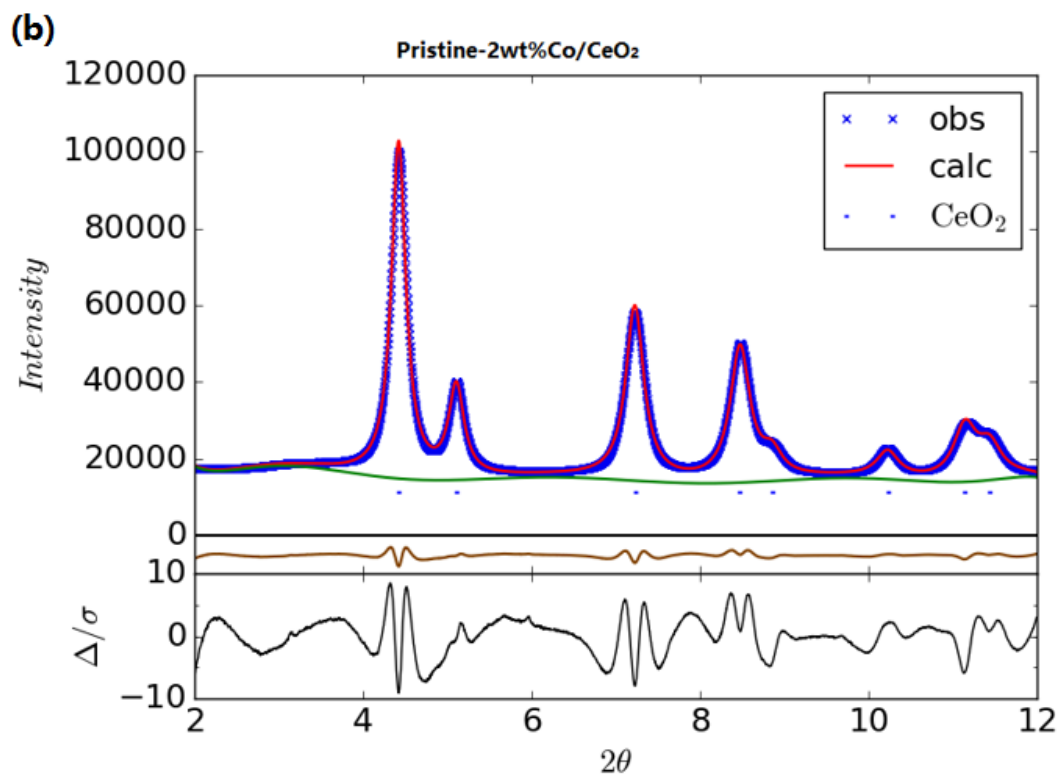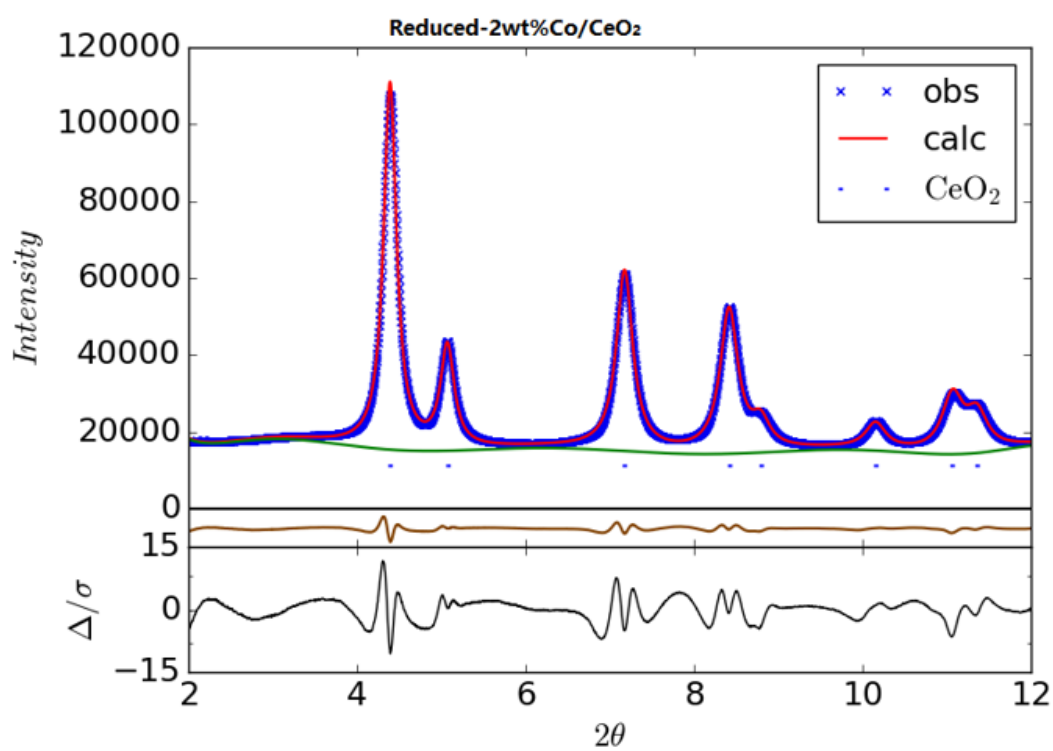

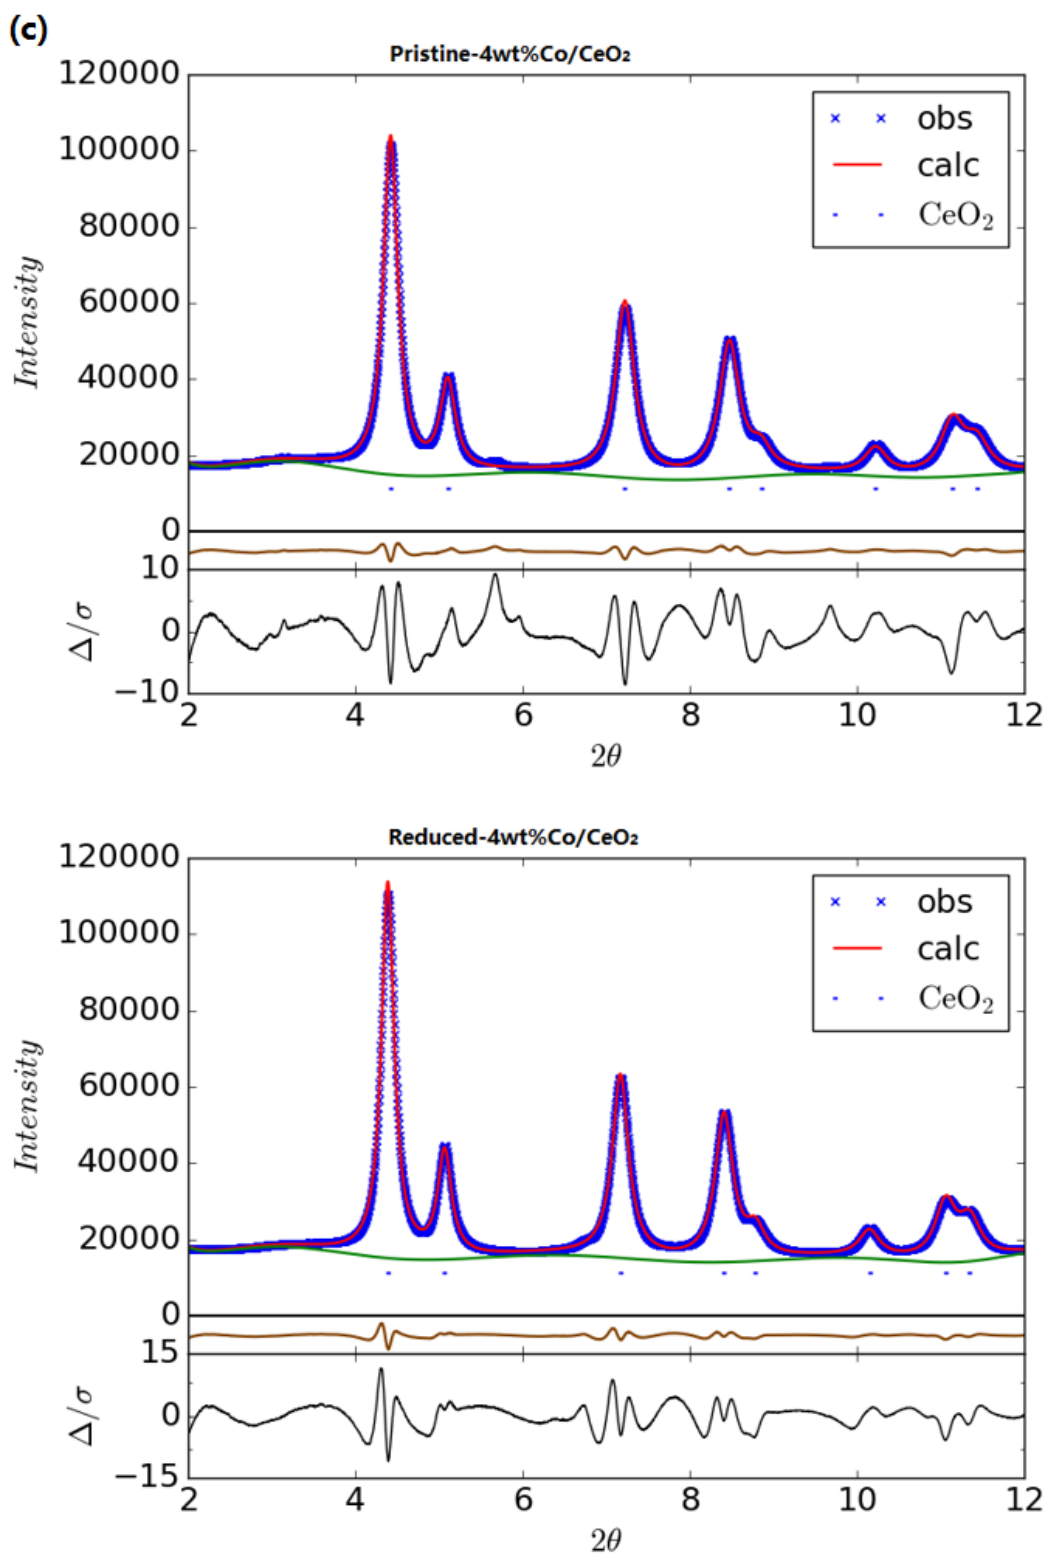

**Figure S1.B.** Rietveld refinement results for the CeO<sub>2</sub> phase in pristine or reduced conditions for (a) 1wt% Co/CeO<sub>2</sub> (b) 2wt% Co/CeO<sub>2</sub> (c) 4wt% Co/CeO<sub>2</sub> catalysts.

**Table S1.** Rietveld refinement results for the CeO<sub>2</sub> phase in pristine and reduced Co/CeO<sub>2</sub> catalysts.

| Sample                                      | CeO <sub>2</sub> Lattice constant (Å) | CeO <sub>2</sub> Crystal size (nm) | CeO <sub>2</sub> microstrain (%) | Data residual (%) |
|---------------------------------------------|---------------------------------------|------------------------------------|----------------------------------|-------------------|
| Pristine-1wt%<br>Co/CeO <sub>2</sub> -25 °C | 5.4114                                | 12                                 | 3.42                             | 1.94 %            |
| Reduced-1wt%<br>Co/CeO <sub>2</sub> -250 °C | 5.4513                                | 14                                 | 3.34                             | 1.92 %            |
| Pristine-2wt%<br>Co/CeO <sub>2</sub> -25 °C | 5.4079                                | 12                                 | 3.66                             | 1.84%             |
| Reduced-2wt%<br>Co/CeO <sub>2</sub> -250 °C | 5.4456                                | 14                                 | 3.56                             | 1.67 %            |
| Pristine-4wt%<br>Co/CeO <sub>2</sub> -25 °C | 5.4086                                | 12                                 | 3.52                             | 1.84 %            |
| Reduced-4wt%<br>Co/CeO <sub>2</sub> -250 °C | 5.4492                                | 14                                 | 3.59                             | 1.72 %            |

# NAP-XPS Section

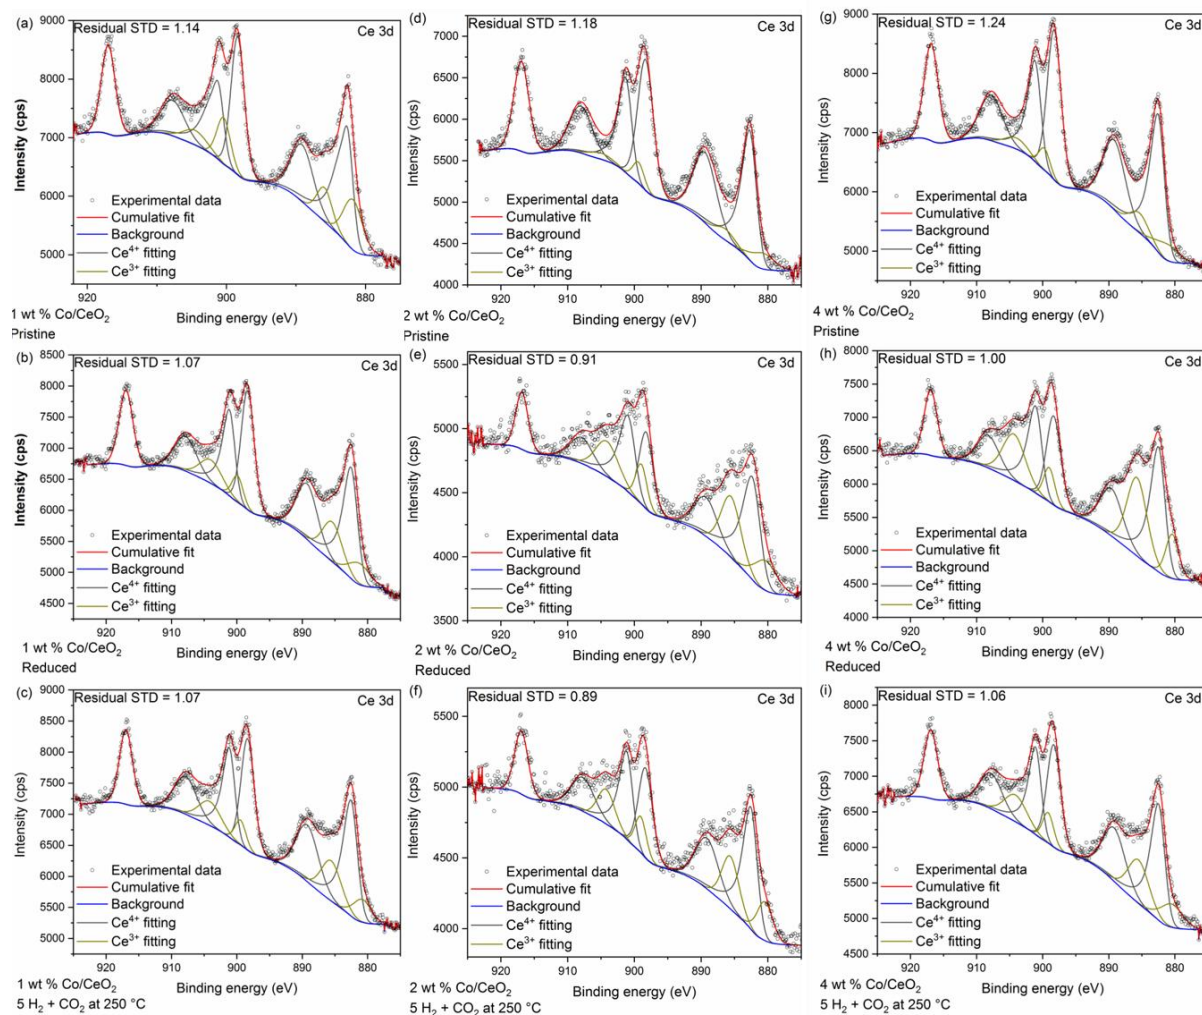

**Figure S2.** peak deconvolution fitting results for 1wt% Co/CeO<sub>2</sub> (a, b, c), 2wt% Co/CeO<sub>2</sub> (d, e, f), and 4wt% Co/CeO<sub>2</sub> (g, h, i) at pristine, reduced and *in situ* conditions.

# XANES section

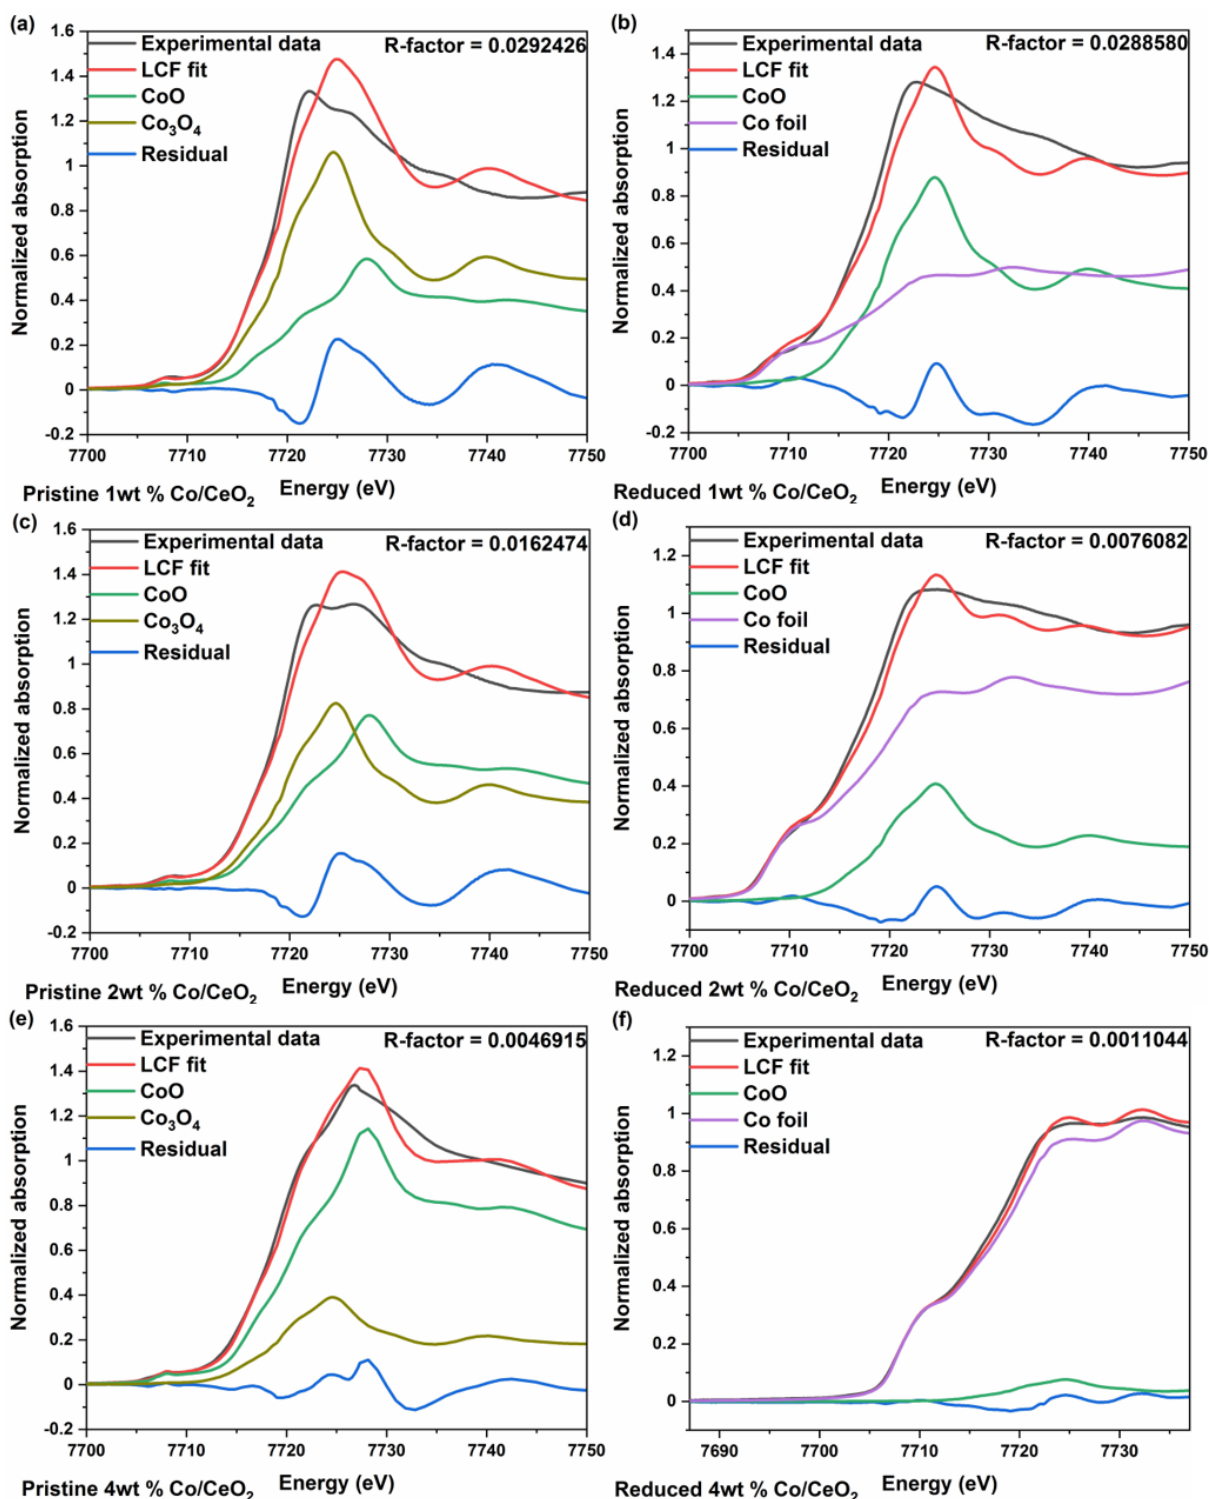

**Figure S3.A.** Linear combination fitting (LCF) on flattened  $\mu(E)$  on Co *K* edge for 1wt% Co/CeO<sub>2</sub> (a, b), 2wt% Co/CeO<sub>2</sub> (c, d) and 4wt% Co/CeO<sub>2</sub> (e, f) at pristine and reduced conditions.



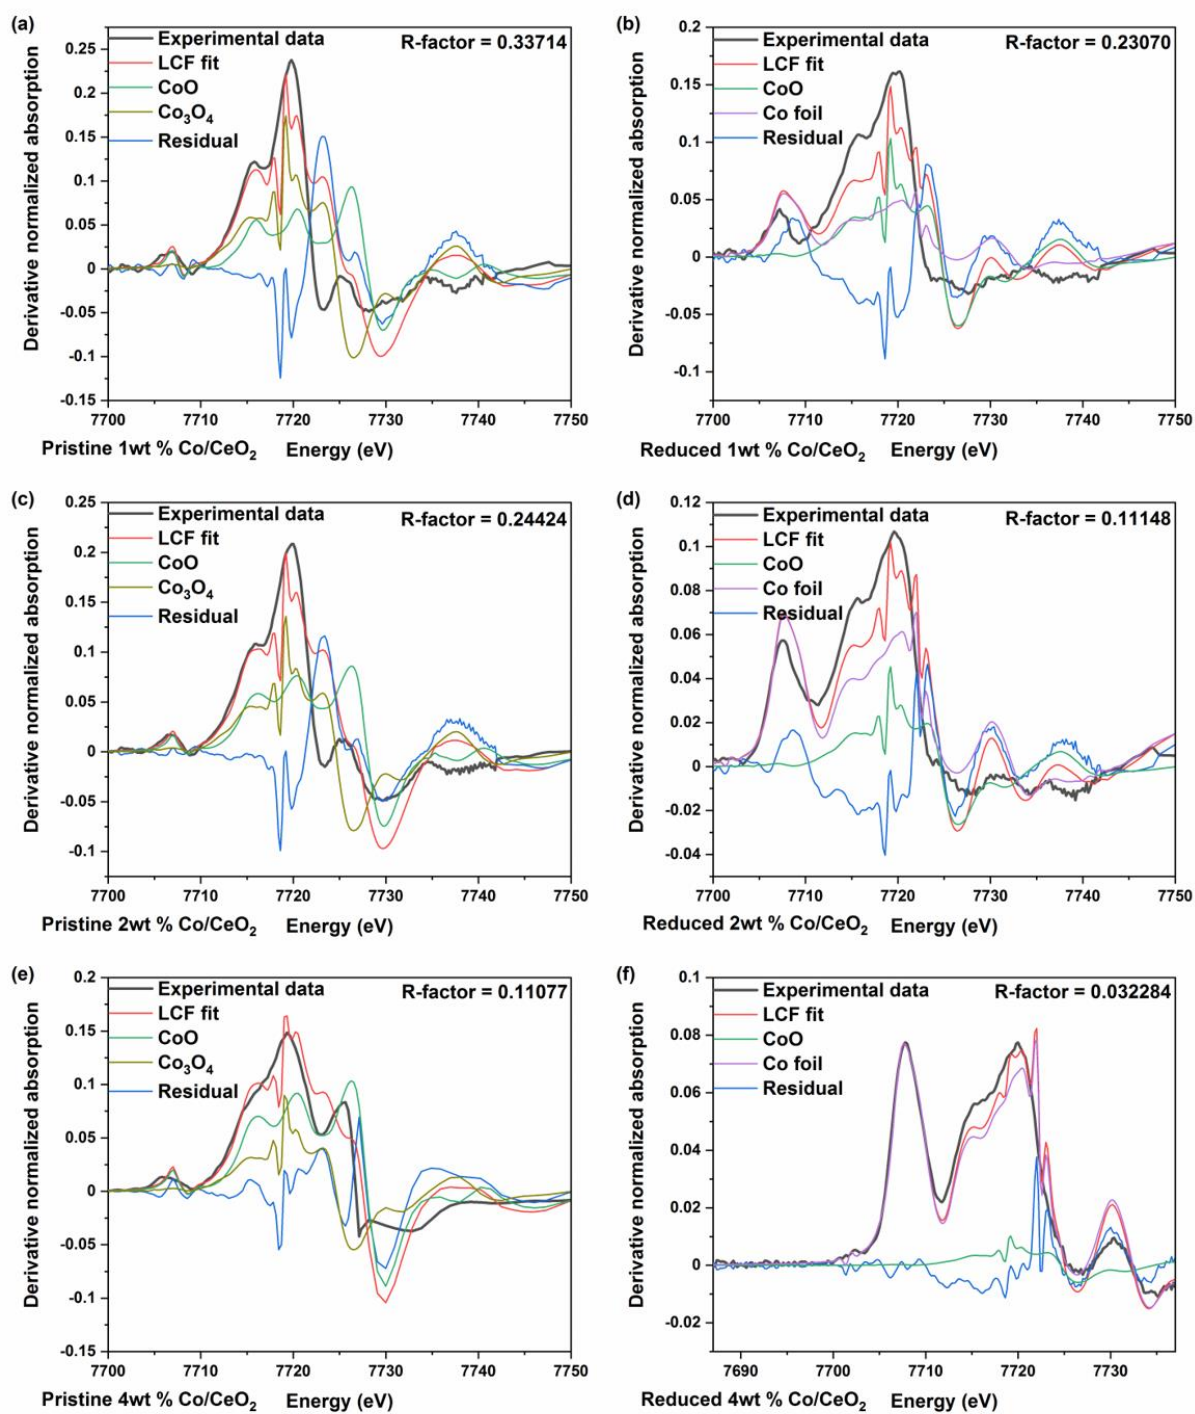

**Figure S3.B.** Linear combination fitting (LCF) on derivative flattened  $\mu(E)$  on Co K edge for 1wt% Co/CeO<sub>2</sub> (a, b), 2wt% Co/CeO<sub>2</sub> (c, d) and 4wt% Co/CeO<sub>2</sub> (e, f) at pristine and reduced conditions.

**Table S2.A.** The composition of each phase determined by linear combination fitting (LCF) with flattened  $\mu(E)$  and derivative flattened  $\mu(E)$ .

| Spectra                   | Condition | Loading (wt%Co) | CoO (%) | Co <sub>3</sub> O <sub>4</sub> (%) | Co foil (%) | R-factor |
|---------------------------|-----------|-----------------|---------|------------------------------------|-------------|----------|
| flattened $\mu(E)$        | Pristine  | 1               | 62      | 38                                 | 0           | 0.0292   |
| Deriv. flattened $\mu(E)$ | Pristine  | 1               | 51      | 49                                 | 0           | 0.3371   |
| flattened $\mu(E)$        | Reduced   | 1               | 51      | 0                                  | 49          | 0.0288   |
| Deriv. flattened $\mu(E)$ | Reduced   | 1               | 30      | 0                                  | 70          | 0.2307   |
| flattened $\mu(E)$        | Pristine  | 2               | 48      | 52                                 | 0           | 0.0162   |
| Deriv. flattened $\mu(E)$ | Pristine  | 2               | 40      | 60                                 | 0           | 0.2442   |
| flattened $\mu(E)$        | Reduced   | 2               | 24      | 0                                  | 76          | 0.0076   |
| Deriv. flattened $\mu(E)$ | Reduced   | 2               | 13      | 0                                  | 87          | 0.1114   |
| flattened $\mu(E)$        | Pristine  | 4               | 23      | 77                                 | 0           | 0.0046   |
| Deriv. flattened $\mu(E)$ | Pristine  | 4               | 28      | 72                                 | 0           | 0.1107   |
| flattened $\mu(E)$        | Reduced   | 4               | 4       | 0                                  | 96          | 0.0011   |
| Deriv. flattened $\mu(E)$ | Reduced   | 4               | 3       | 0                                  | 97          | 0.0322   |

**Table S2.B.** The percentage difference of CoO phase between pristine and reduced conditions  $\{(Pristine\ CoO - reduced\ CoO)/pristine\ CoO\}$  determined by linear combination fitting (LCF) with flattened  $\mu(E)$  and derivative flattened  $\mu(E)$ .

| Sample                   | Change in CoO amount (%) in LCF of flattened $\mu(E)$ | Change in CoO amount (%) in LCF of deriv. flattened $\mu(E)$ |
|--------------------------|-------------------------------------------------------|--------------------------------------------------------------|
| 1wt% Co/CeO <sub>2</sub> | 18                                                    | 41                                                           |
| 2wt% Co/CeO <sub>2</sub> | 50                                                    | 68                                                           |
| 4wt% Co/CeO <sub>2</sub> | 83                                                    | 89                                                           |

## EXAFS section

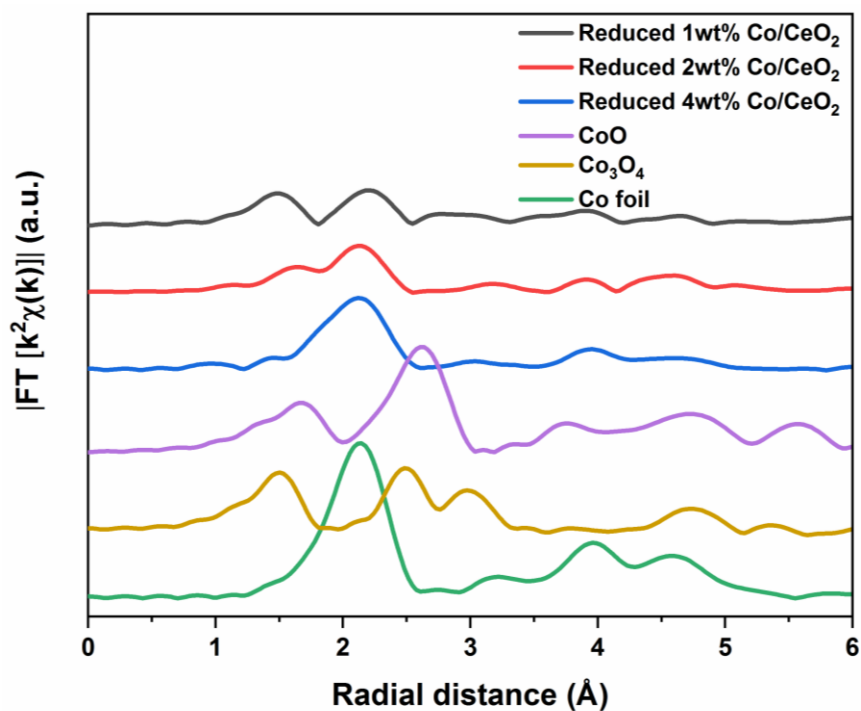

**Figure S4.A.** The magnitude of  $\chi(R)$  in the Co *K* edge for reduced 1wt%, 2wt%, 4wt% Co/CeO<sub>2</sub>, CoO, Co<sub>3</sub>O<sub>4</sub> and Co foil.

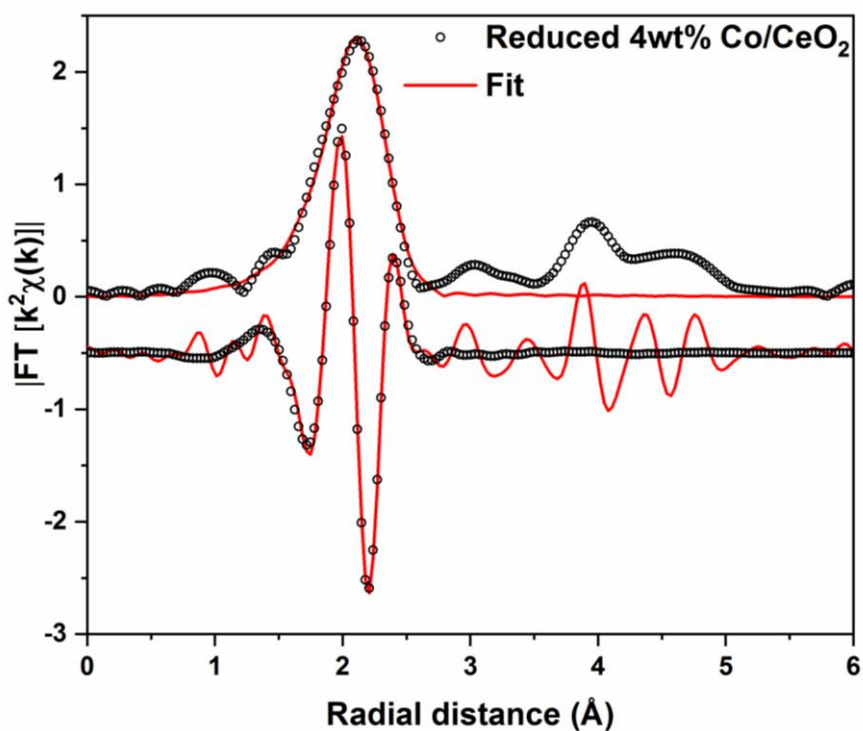

**Figure S4.B.** The fitting result in the Co-Co shell of  $\chi(R)$  for reduced 4wt% Co/CeO<sub>2</sub>

**Table S3A** The parameter values from the fitting result of  $\chi(R)$  for reduce 4wt% Co/CeO<sub>2</sub>

| Sample                             | Shell | Bond length<br>Å | Coordination<br>Number | $\sigma^2$ (Å <sup>2</sup> ) | E <sub>0</sub> shift<br>(eV) | R-factor |
|------------------------------------|-------|------------------|------------------------|------------------------------|------------------------------|----------|
| Reduced<br>4wt%Co/CeO <sub>2</sub> | Co-Co | 2.49 ± 0.01      | 8.7 ± 0.7              | 0.010 ± 0.001                | -1.3                         | 0.008    |

**Table S3B.** The relationship between the first shell coordination number and the particle size using the half sphere particle model for a metal with a fcc structure<sup>1</sup>.

| First shell Coordination Number | Size (nm) |
|---------------------------------|-----------|
| 6.32                            | 1.3       |
| 7.39                            | 1.8       |
| 8.41                            | 2.2       |
| 9.05                            | 2.7       |
| 9.27                            | 2.9       |
| 9.6                             | 3.3       |

## The analysis on the Co-O bond length using EXAFS data

A typical form of the EXAFS function is given by<sup>2,3</sup>:

$$\chi(k) = \sum_R N_R S_0^2 \frac{|f(k)|}{kR^2} e^{\frac{-2R}{\lambda(k)}} e^{-2\sigma^2 k^2} \sin(2kR + 2\delta_c + \Phi)$$

In the function: R is interatomic distances,  $N_R$  is the coordination number,  $\sigma^2$  is mean-square relative displacement  $f(k) = |f(k)|e^{i\Phi(k)}$  is the backscattering amplitude.  $\delta_c$  and  $\Phi$  are phase shifts for the absorber and backscatterer.  $\lambda(k)$  is the energy dependent XAFS mean free path.  $S_0^2$  is a many-body amplitude reduction factor.

As for the system in this study, the  $\chi(k)$  contribution from the Co-O first shell can be isolated by Fourier filtering which has been demonstrated in literature<sup>4,5</sup>. The  $k^3\chi(k)$  is used to make first shell easier to separate from the second shell in the  $\chi(R)$ , as shown in **Figure S4C**, the R space region of 1.3 ~ 1.8 Å for 1wt% and 2wt% Co/CeO<sub>2</sub> and 1.3 ~ 2.0 Å for CoO reverse in Fourier transform. And the phase part corresponding to  $(2kR_{Co-O} + \delta_c(k) + \Phi(k))$  were obtained in the Athena and plotted as a function of  $q(\text{Å}^{-1})$  in **Figure S4C(b)**, the q maximum (12 Å<sup>-1</sup>) is smaller than the one used in the forward Fourier transform to avoid Fourier filtering errors<sup>5</sup>. It has been shown in literature that the phase shifts  $(2\delta_c + \Phi)$  in EXAFS are essentially independent of chemical environment for photoelectron energies > 100 eV  $\approx 5.1 \text{ Å}^{-1}$ . And the interatomic distances can be determined typically to accuracies of 0.02 Å<sup>6</sup>. Therefore, the  $R_{Co-O}$  of CoO was used as a reference to cancel out the phase shifts from the samples.

And the  $\Delta R_{Co-O}$  of samples can be calculated by:  $\Delta R_{Co-O} = \frac{\text{Pha}[k^3\chi(q)]_{sample} - \text{Pha}[k^3\chi(q)]_{CoO}}{2q}$  as shown in Figure S4C(c). The same process was used to evaluate the  $\Delta R_{Co-O}$  of Co(OH)<sub>2</sub> from its standard spectra obtained from Farrel Lytle Database. Our data analysis on standard Co(OH)<sub>2</sub> spectra demonstrates the bond length can be determined by the method to 0.02 Å accuracy. According to our calculation using Feff<sup>2,7,8</sup> on standard CoO and Co(OH)<sub>2</sub> structure, the Co-O bond length results are:  $R_{Co-O}(\text{CoO}) = 2.14 \text{ Å}$ ,  $R_{Co-O}(\text{Co(OH)}_2) = 2.10 \text{ Å}$ .

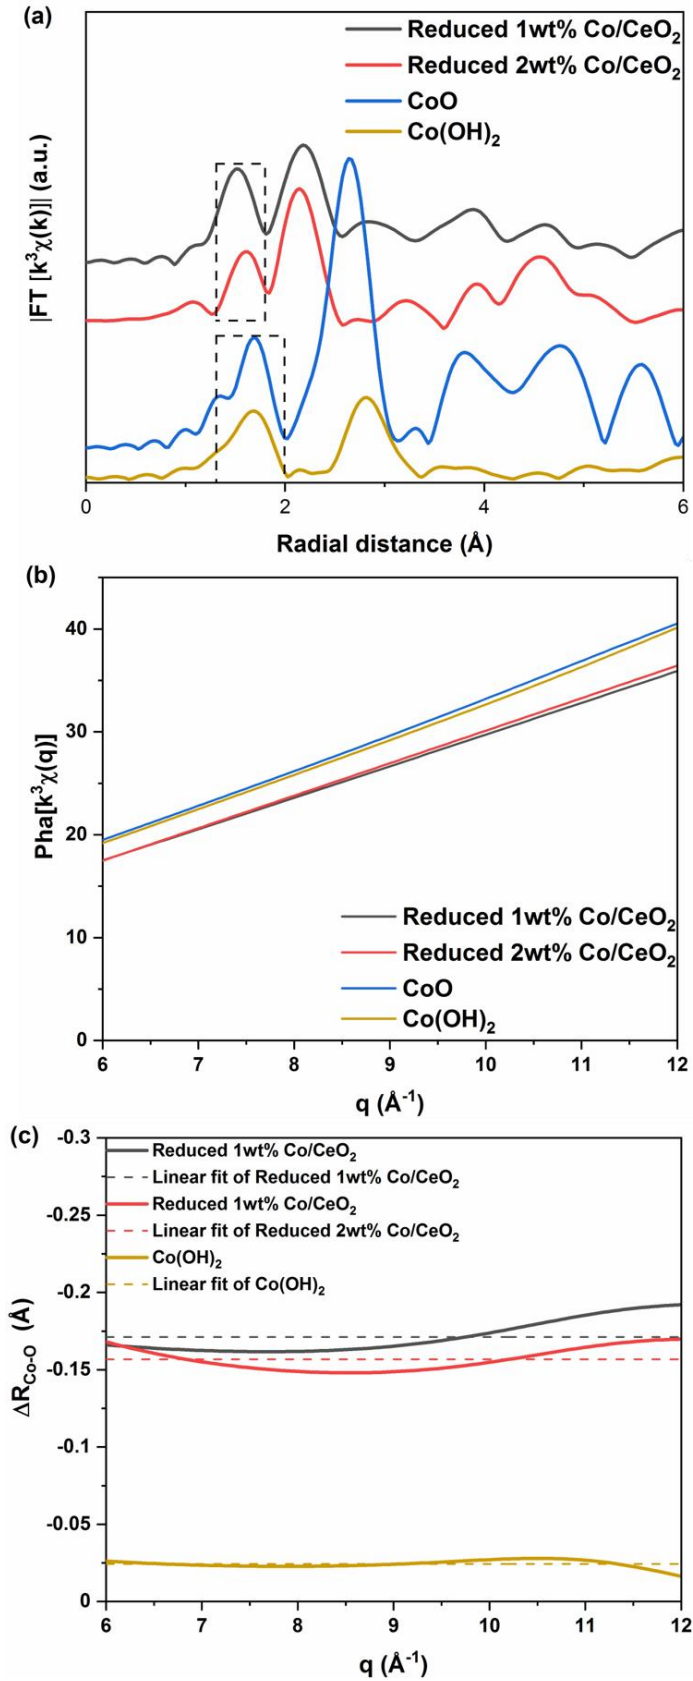

**Figure S4C.** The Fourier transfer results of  $k^3\chi(k)$  (a) the phase part  $Pha[k^3\chi(q)]$  from Fourier filtering (b) the  $\Delta R_{Co-O}$  analyzed from the phase part of Fourier filtering using  $R_{Co-O}$  (CoO) as reference  $\Delta R_{Co-O}$  ( $R_{Co-O}$  (sample) -  $R_{Co-O}$  (CoO)) (c) for 1wt%Co/CeO<sub>2</sub>, reduced 2wt%Co/CeO<sub>2</sub> and Co(OH)<sub>2</sub>

**Table S3C.** The linear fitting results using a line with 0 slope on  $\Delta R_{\text{Co-O}}$  ( $R_{\text{Co-O}}$  (sample) -  $R_{\text{Co-O}}$  (CoO)), the XAS spectra of standard  $\text{Co(OH)}_2$  is from Farrel Lytle Database

| Sample                  | $\Delta R_{\text{Co-O}}$ from fitting | $R_{\text{Co-O}}$ (with $R_{\text{Co-O}}$ (CoO) = 2.14 Å) | Residual sum of squares |
|-------------------------|---------------------------------------|-----------------------------------------------------------|-------------------------|
| 1wt%Co/CeO <sub>2</sub> | -0.17                                 | 1.97                                                      | 0.0128                  |
| 2wt%Co/CeO <sub>2</sub> | -0.16                                 | 1.98                                                      | 0.0063                  |
| Co(OH) <sub>2</sub>     | -0.02                                 | 2.12                                                      | 0.0006                  |

## *In situ* DRIFTS for flow system

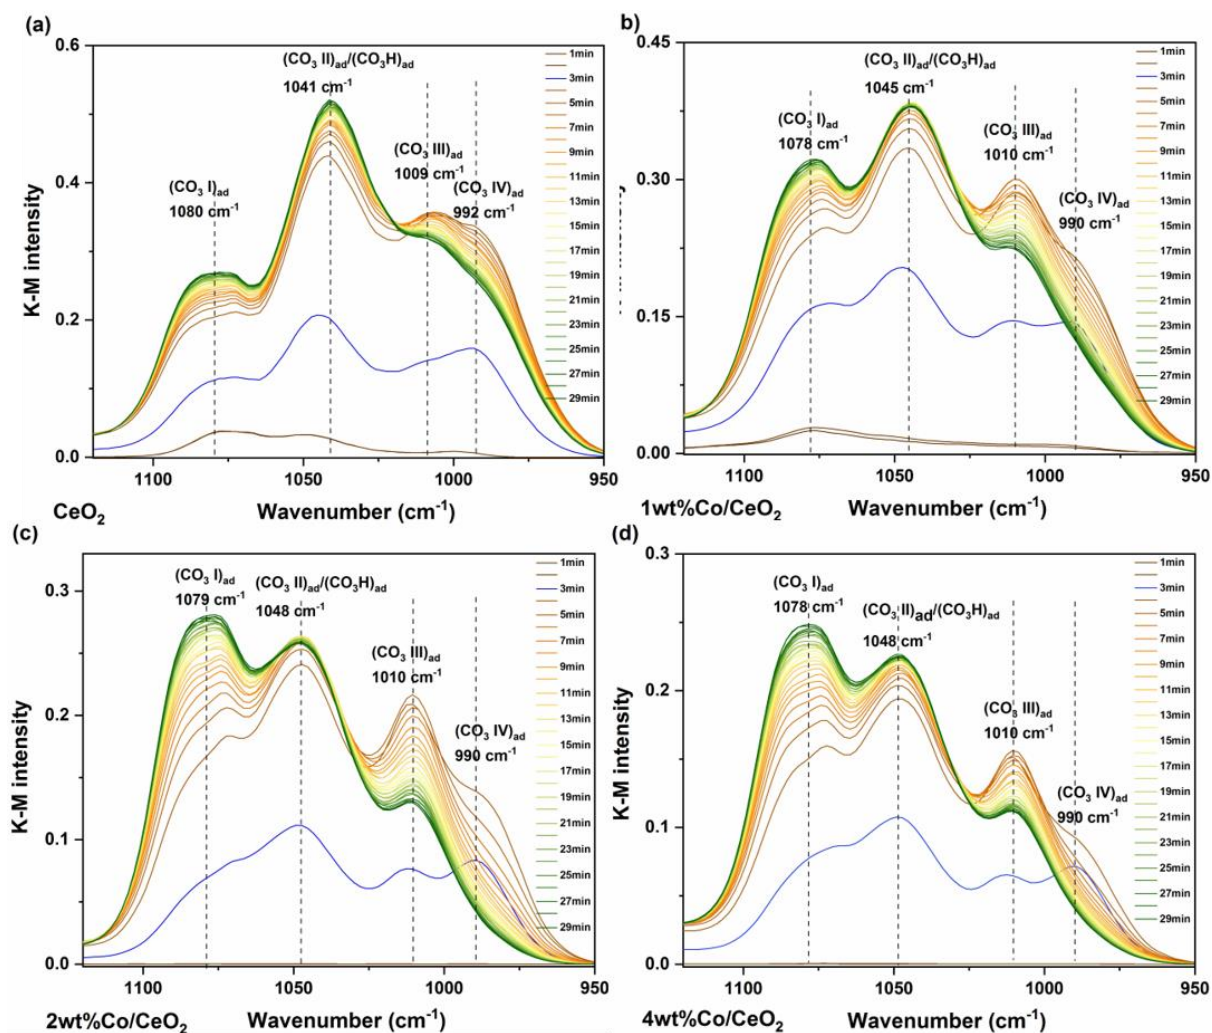

**Figure S5.** The evolution of signal in the region of carbonate and hydrogen carbonate  $\nu(\text{CO})$  bands collected during *in situ* DRIFTS flow experiments for (a) CeO<sub>2</sub>, (b) 1wt%Co/CeO<sub>2</sub>, (c) 2wt%Co/CeO<sub>2</sub> and (d) 4wt%Co/CeO<sub>2</sub>.



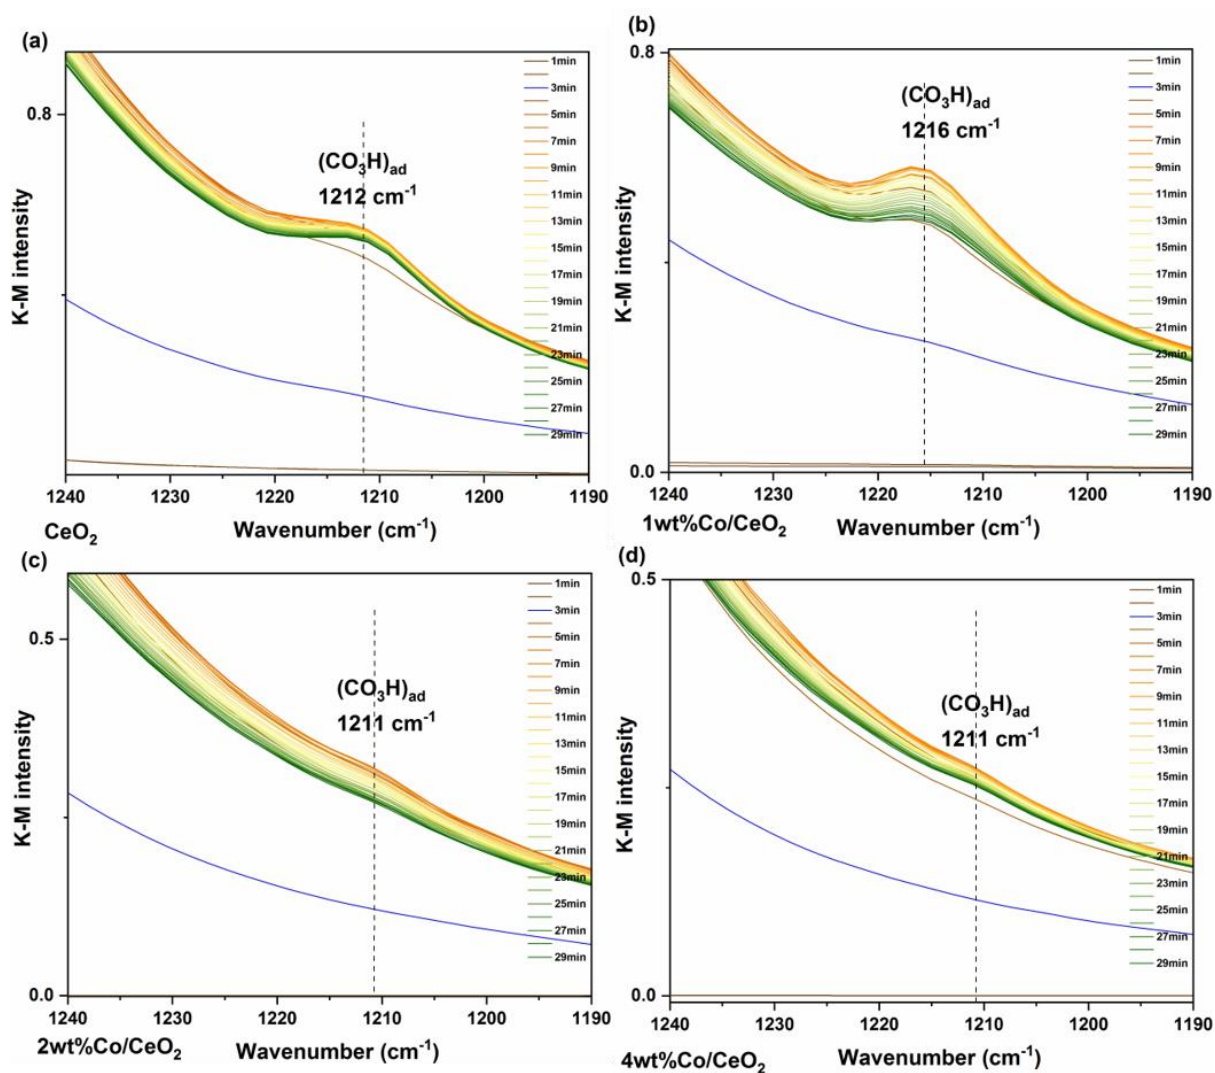

**Figure S6.** The evolution of signals in the region of hydrogen carbonate  $\delta(\text{COH})$  collected during *in situ* DRIFTS flow experiments for (a) plain CeO<sub>2</sub>, (b) 1wt%Co/CeO<sub>2</sub>, (c) 2wt%Co/CeO<sub>2</sub> and (d) 4wt%Co/CeO<sub>2</sub>.

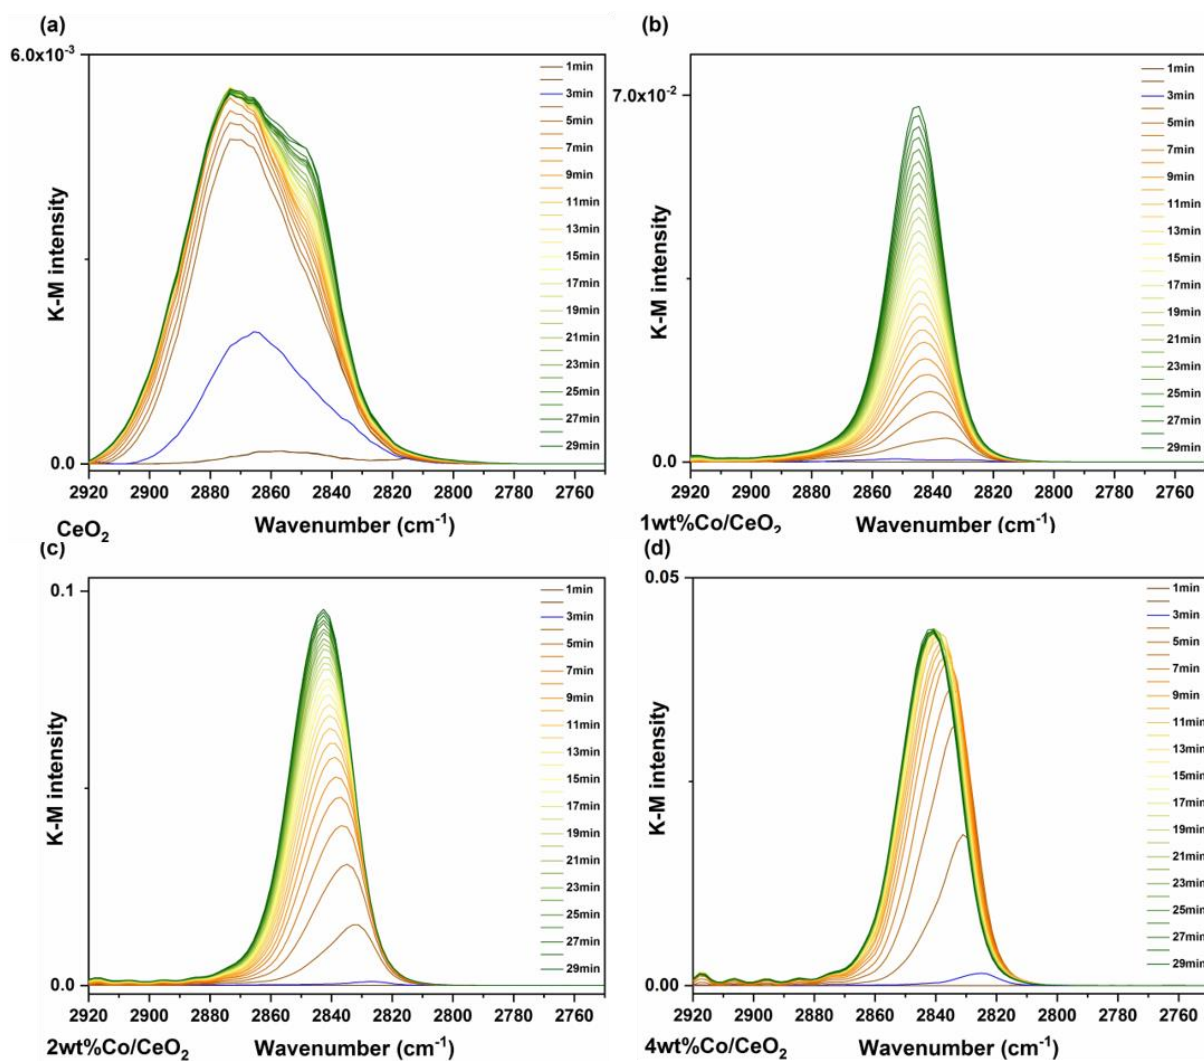

**Figure S7.** *In situ* DRIFTS data collected in flow experiments for (a) plain  $\text{CeO}_2$ , (b) 1wt%Co/ $\text{CeO}_2$ , (c) 2wt%Co/ $\text{CeO}_2$  and (d) 4wt%Co/ $\text{CeO}_2$  in the region of 2750-2920  $\text{cm}^{-1}$ .

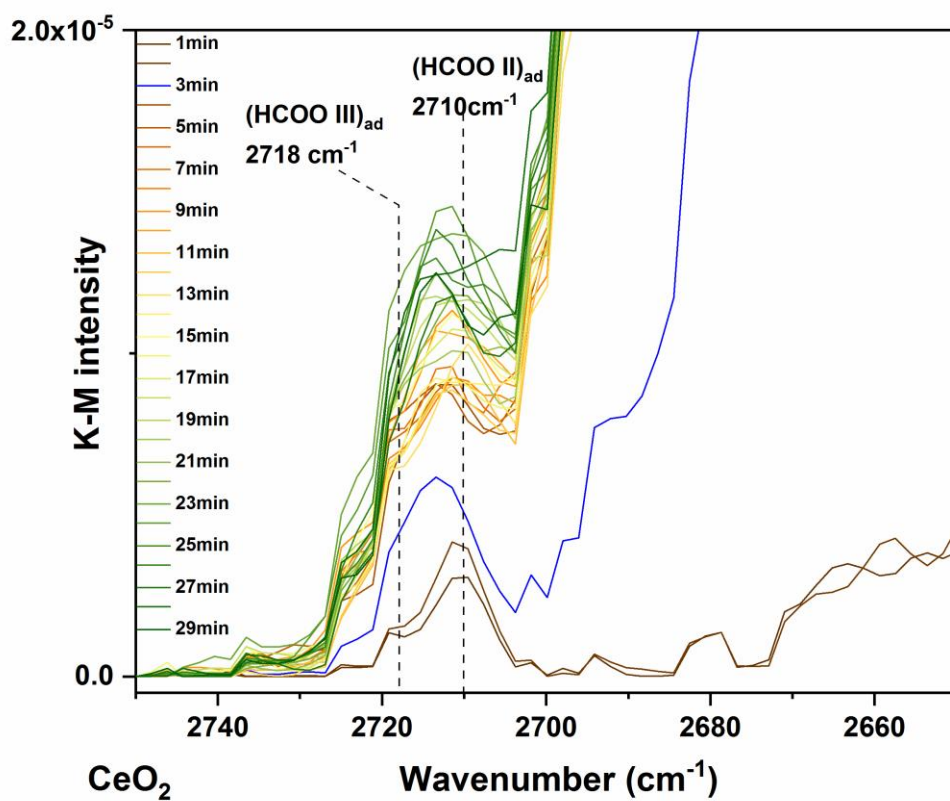

Figure S8. *In situ* DRIFTS data collected in flow experiments for  $\text{CeO}_2$  at the 2650-2750  $\text{cm}^{-1}$  region.

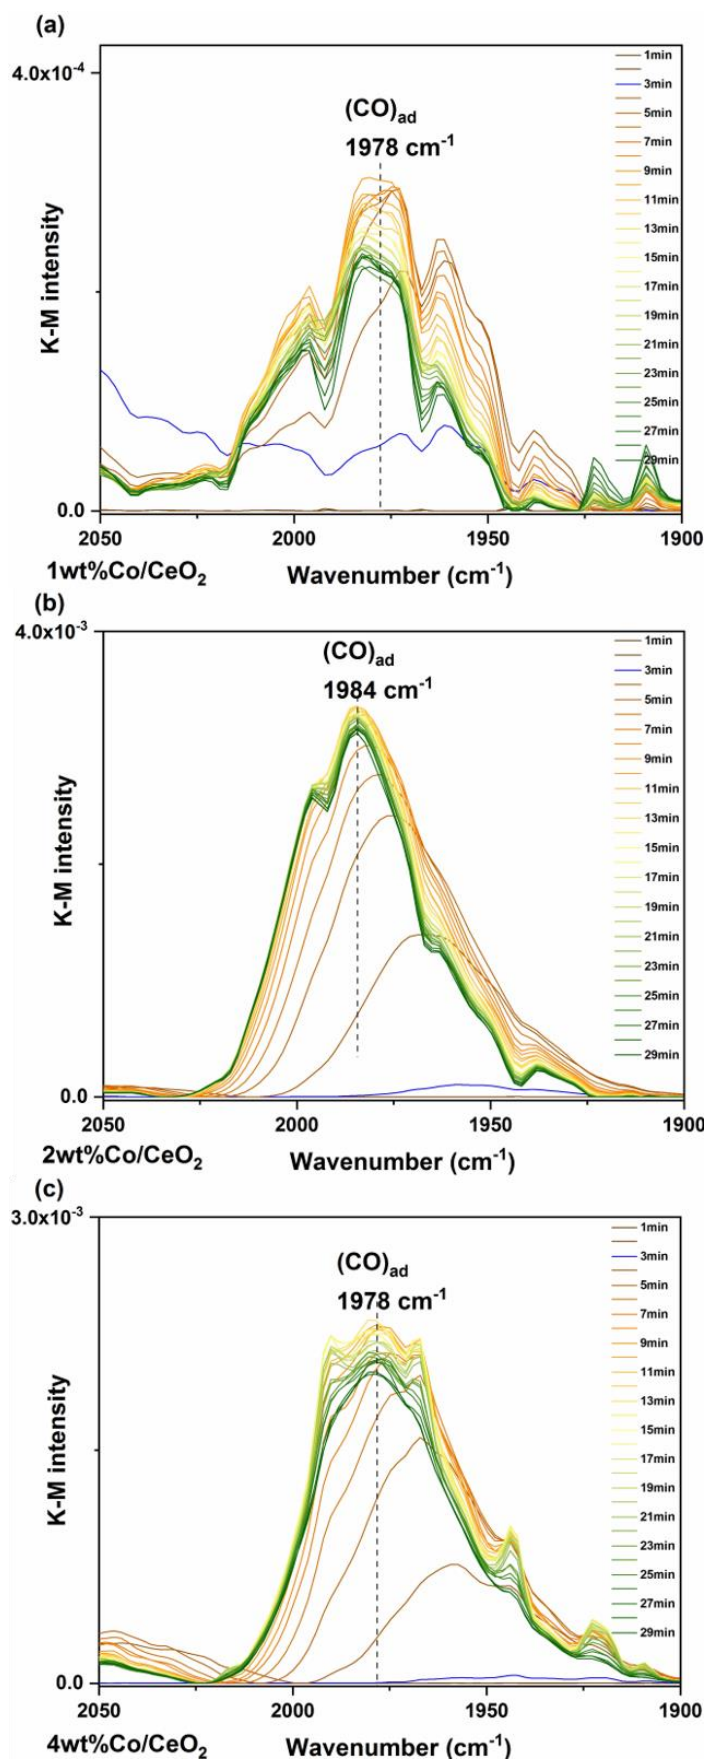

**Figure S9.** The evolution of signals in the region of the CO  $\nu(\text{CO})$  band collected during *in situ* DRIFTS flow experiments for (a) 1wt%Co/CeO<sub>2</sub>, (b) 2wt%Co/CeO<sub>2</sub> and (c) 4wt%Co/CeO<sub>2</sub>.

## *In situ* DRIFTS for closed system

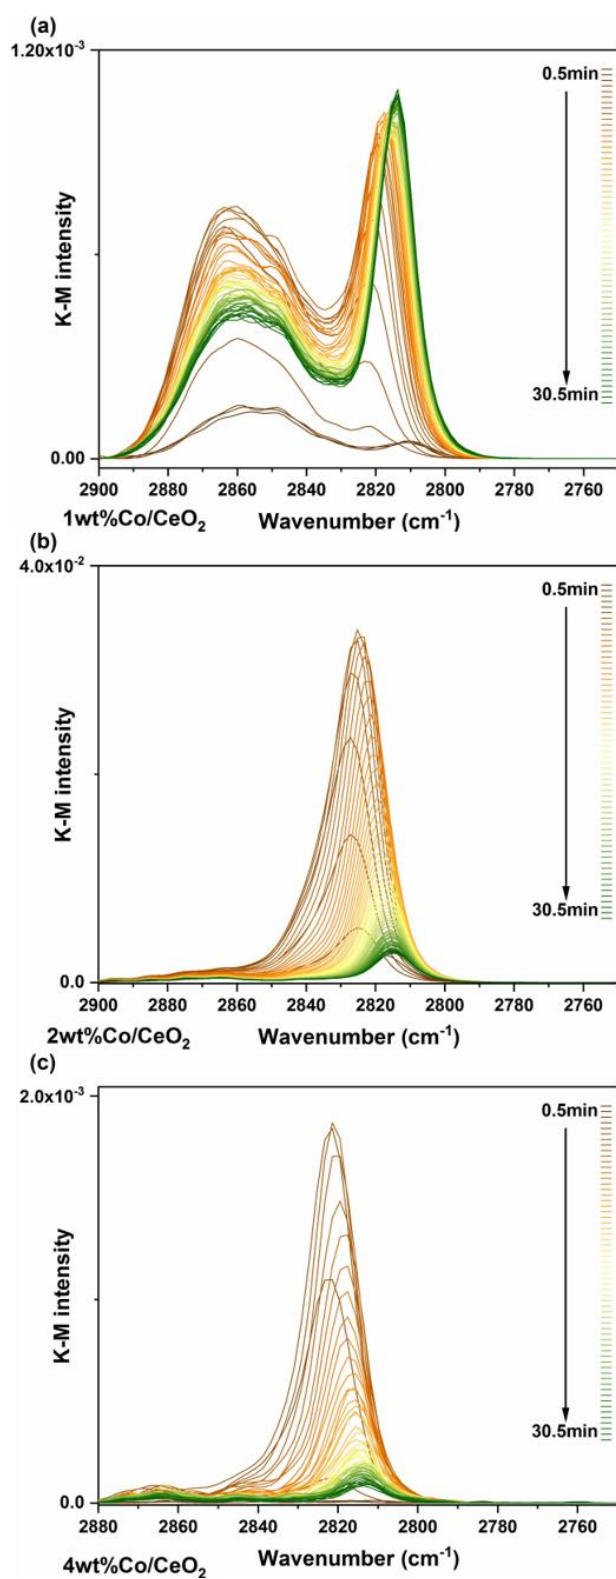

**Figure S10.** The evolution of signal in the region of 2750-2880  $\text{cm}^{-1}$  collected during *in situ* DRIFTS closed-system experiments for (a) 1wt%Co/CeO<sub>2</sub>, (b) 2wt%Co/CeO<sub>2</sub> and (c) 4wt%Co/CeO<sub>2</sub>.

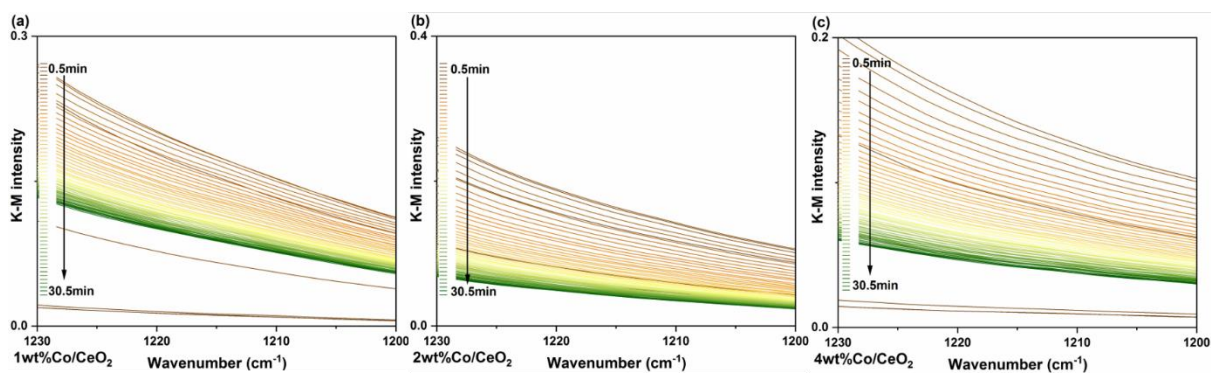

**Figure S11.** The evolution of signal in the region of the hydrogen carbonate  $\delta(\text{COH})$  band collected during *in situ* DRIFTS closed-system experiments for (a) 1wt%Co/CeO<sub>2</sub>, (b) 2wt%Co/CeO<sub>2</sub> and (c) 4wt%Co/CeO<sub>2</sub> catalysts.

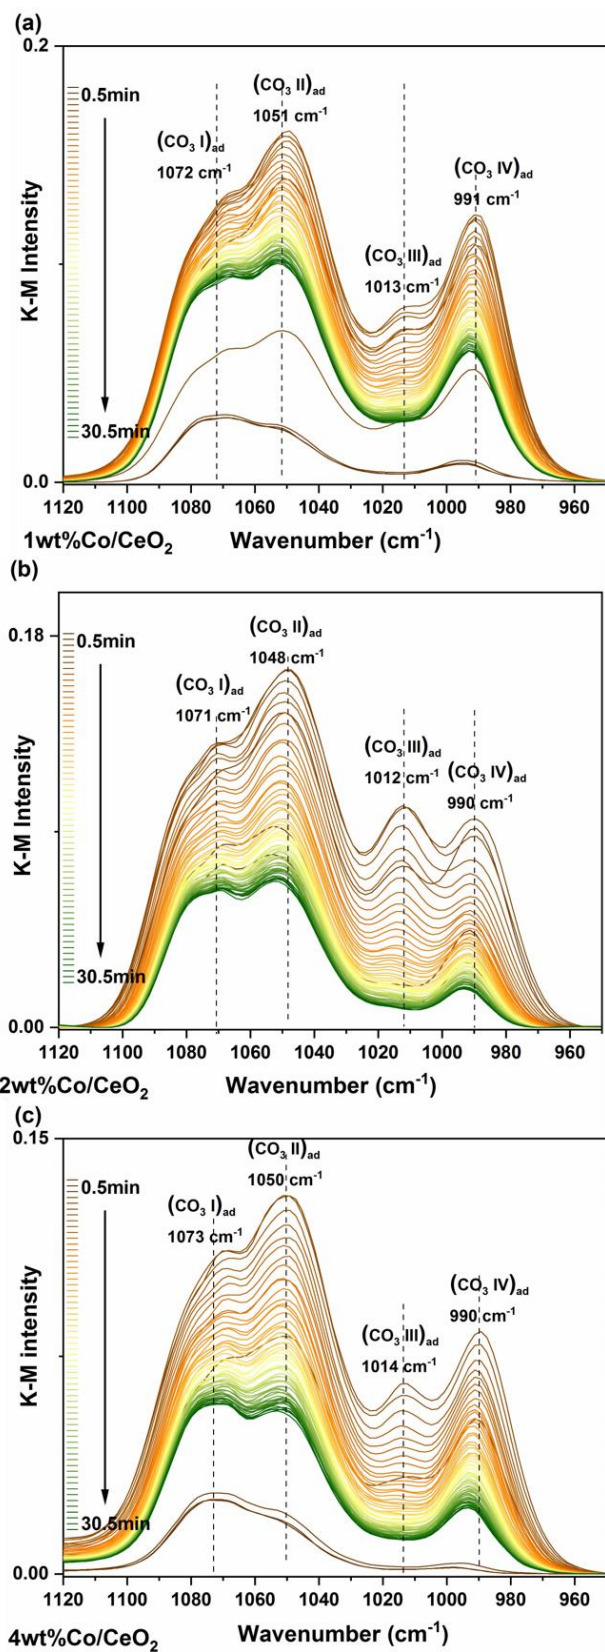

**Figure S12.** The evolution of carbonate and hydrogen carbonate  $\nu(\text{CO})$  bands collected during *in situ* DRIFTS in **closed-system** experiments. (a) 1wt%Co/CeO<sub>2</sub>, (b) 2wt%Co/CeO<sub>2</sub>, (c) 4wt%Co/CeO<sub>2</sub>

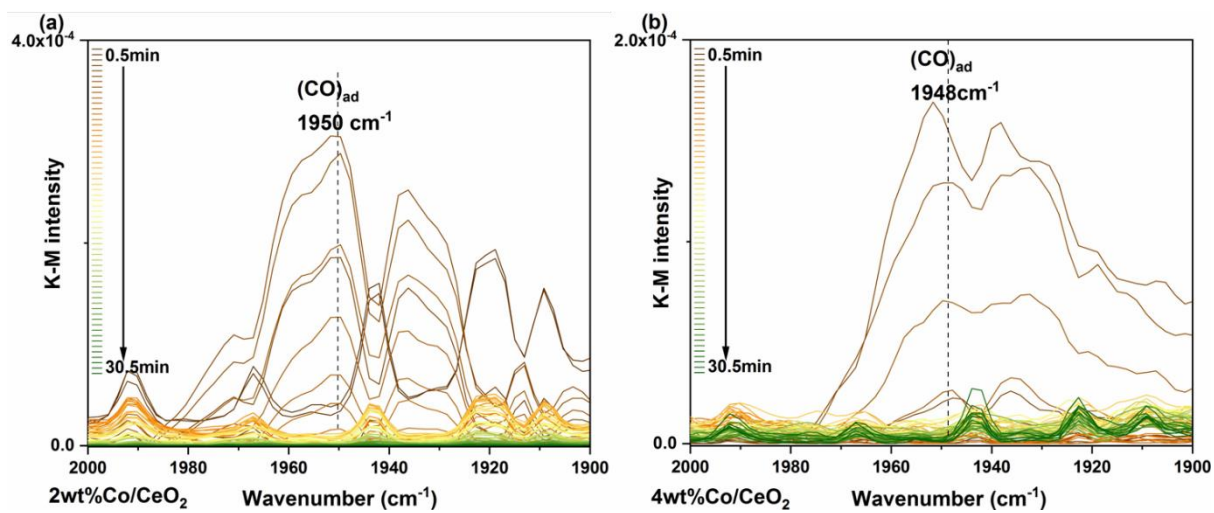

**Figure S13.** The evolution of signal in the region of 1900-2000 cm<sup>-1</sup> (adsorbed CO v(CO) band) collected during *in situ* DRIFTS closed-system experiments. (a) 1wt%Co/CeO<sub>2</sub>, (b) 2wt%Co/CeO<sub>2</sub>



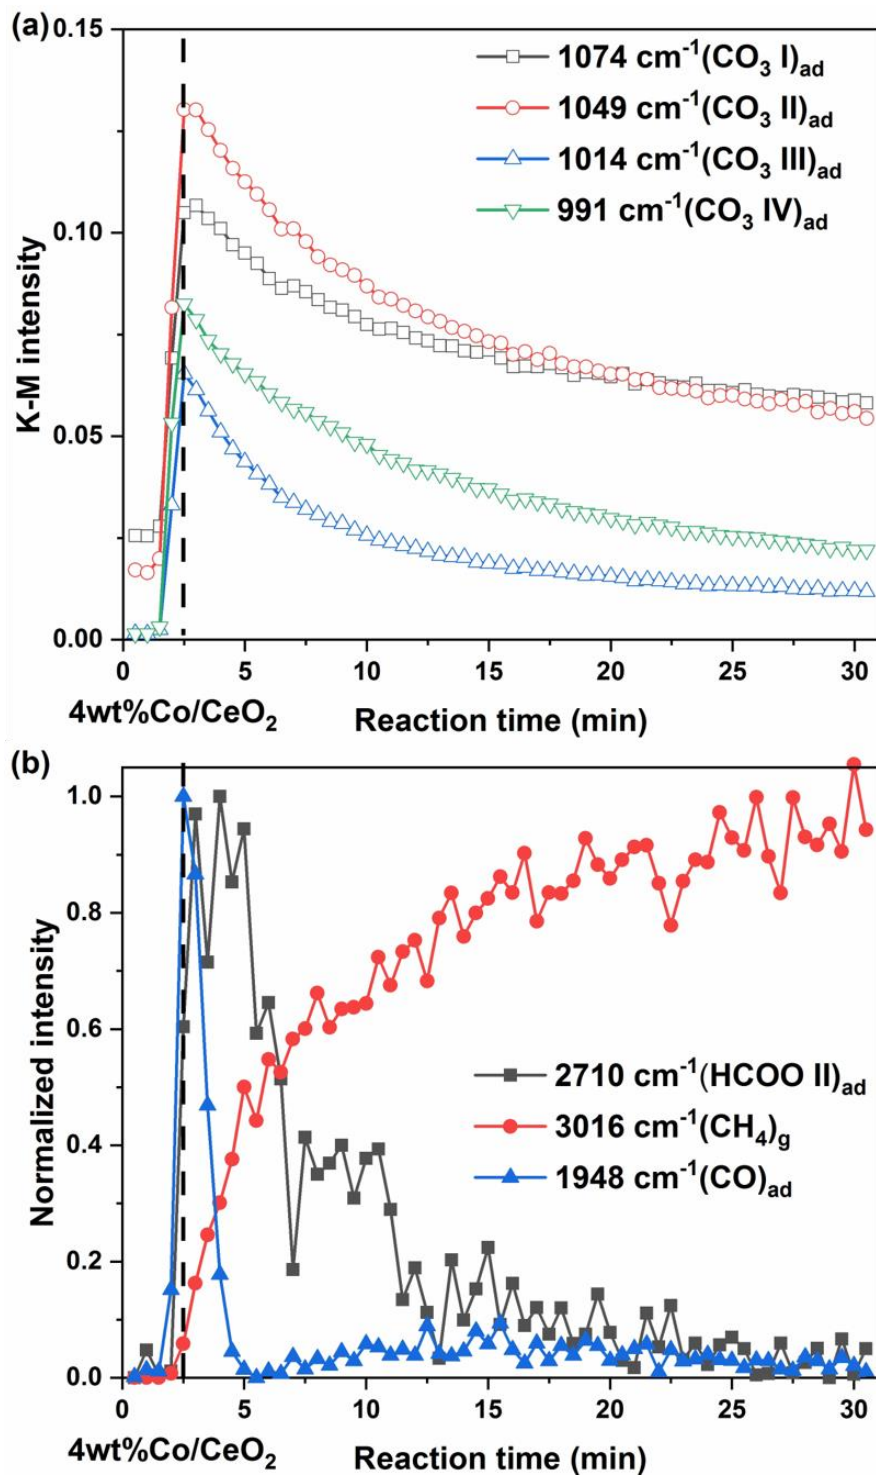

**Figure S14**, Evolution of (a) carbonate species (b) formate, adsorbed CO and CH<sub>4</sub> gas phase for 4wt%Co/CeO<sub>2</sub> catalyst, with corresponding normalized peak intensity, derived from *in situ* DRIFTS experiments on **closed-system** at 250 °C, 1atm pressure. Approximate 1v%CO<sub>2</sub> in H<sub>2</sub> was introduced into the cell before valves were switched off. The highest CO<sub>2</sub> concentration was observed at 2.5 min (marked with dash).

## Summary of relevant peak assignments in the literature

**Table S4** Summary of peak assignments (in wavenumber  $\text{cm}^{-1}$ ) for adsorbed carbonate and formate according to the literature.

| Carbonate                             |                            | $\nu(\text{CO})$ | $\nu(\text{CO})$ | $\nu(\text{CO})$ | $\nu(\text{CH})$ | $\delta(\text{OCH})$ | $\delta(\text{COH})$ | Combination band | Ref. |
|---------------------------------------|----------------------------|------------------|------------------|------------------|------------------|----------------------|----------------------|------------------|------|
| Bidentate carbonate                   |                            | 1567             | 1289             | 1014             |                  |                      |                      |                  | 9    |
|                                       |                            | 1566             | 1300             | 1019             |                  |                      |                      |                  | 10   |
|                                       |                            | 1563             | 1296             | 1015             |                  |                      |                      |                  | 11   |
|                                       | Tridentate carbonate       | 1568-1596        | 1286-1303        | 990-1018         |                  |                      |                      | ~2850            | 12   |
| Polydentate /or monodentate carbonate |                            | 1465             | 1359             | 1080             |                  |                      |                      |                  | 10   |
|                                       |                            | 1456             | 1348             | 1040             |                  |                      |                      |                  | 11   |
|                                       |                            | 1462             | 1353             | 1066             |                  |                      |                      |                  | 13   |
| Tridentate carbonate                  | Ce <sup>3+</sup>           | 1490             | 1380             | 1085             |                  |                      |                      |                  | 12   |
|                                       | Ce <sup>4+</sup>           | 1451-1500        | 1342-1380        | 1038-1065        |                  |                      |                      | ~2876            |      |
| Hydrogen carbonate                    | I                          | 1599             | 1413             | 1025             |                  |                      | 1218                 |                  | 13   |
|                                       | II                         | 1613             | 1391             | 1045             |                  |                      | 1218                 |                  |      |
|                                       |                            | 1609             | 1395             | 1044             |                  |                      | 1217                 |                  | 10   |
| formate                               |                            | 1558             | 1329             |                  | 2852             | 1369                 |                      |                  | 9    |
|                                       |                            | 1584             | 1330             |                  | 2838             | 1375                 |                      |                  | 10   |
|                                       |                            | 1547-1561        | 1360-1358        |                  | 2845-2850        | 1372-1373            |                      | 2935, 2725       | 12   |
|                                       | I (on Ce <sup>3+</sup> )   | 1580             | 1335             |                  |                  | ~1370                |                      |                  | 14   |
|                                       | II (on Ce <sup>3+</sup> )  | 1561             | 1356             |                  |                  | ~1370                |                      |                  |      |
|                                       | III (on Ce <sup>4+</sup> ) | 1550             | 1371             |                  |                  | ~1370                |                      |                  |      |

## References

1. A. M. Beale and B. M. Weckhuysen, *Physical Chemistry Chemical Physics*, 2010, **12**, 5562-5574.
2. J. J. Rehr and R. C. Albers, *Reviews of Modern Physics*, 2000, **72**, 621-654.
3. P. A. O'Day, J. J. Rehr, S. I. Zabinsky and G. E. Brown, Jr., *Journal of the American Chemical Society*, 1994, **116**, 2938-2949.
4. E. A. Stern, B. A. Bunker and S. M. Heald, *Physical Review B*, 1980, **21**, 5521-5539.
5. D. C. Koningsberger, B. L. Mojte, G. E. van Dorssen and D. E. Ramaker, *Topics in Catalysis*, 2000, **10**, 143-155.
6. P. H. Citrin, P. Eisenberger and B. M. Kincaid, *Physical Review Letters*, 1976, **36**, 1346-1349.
7. J. J. Rehr, J. J. Kas, M. P. Prange, A. P. Sorini, Y. Takimoto and F. Vila, *Comptes Rendus Physique*, 2009, **10**, 548-559.
8. J. J. Rehr, J. J. Kas, F. D. Vila, M. P. Prange and K. Jorissen, *Physical Chemistry Chemical Physics*, 2010, **12**, 5503-5513.
9. C. Li, Y. Sakata, T. Arai, K. Domen, K.-i. Maruya and T. Onishi, *Journal of the Chemical Society, Faraday Transactions 1: Physical Chemistry in Condensed Phases*, 1989, **85**, 1451-1461.
10. O. Pozdnyakova, D. Teschner, A. Wootsch, J. Kröhnert, B. Steinhauer, H. Sauer, L. Toth, F. C. Jentoft, A. Knop-Gericke, Z. Paál and R. Schlögl, *Journal of Catalysis*, 2006, **237**, 17-28.
11. C. Binet, A. Badri, M. Boutonnet-Kizling and J.-C. Lavalley, *Journal of the Chemical Society, Faraday Transactions*, 1994, **90**, 1023-1028.
12. G. N. Vayssilov, M. Mihaylov, P. S. Petkov, K. I. Hadjiivanov and K. M. Neyman, *The Journal of Physical Chemistry C*, 2011, **115**, 23435-23454.
13. C. Binet, M. Daturi and J.-C. Lavalley, *Catalysis Today*, 1999, **50**, 207-225.
14. P. G. Lustemberg, M. V. Bosco, A. Bonivardi, H. F. Busnengo and M. V. Ganduglia-Pirovano, *The Journal of Physical Chemistry C*, 2015, **119**, 21452-21464.
